# Supplementary material for: Unmet Healthcare Needs of Children in Vulnerable Families in South Korea: Finding from the Community Child Center Child Panel Survey
Source: MDPI journal article supplement (doi:10.3390/ijerph17218241), 2020-11-07
Supplement: s1 [file s1]

**Table 1.** Differences between two groups of children based on diseases in the previous year.

(N = 515)

| Characteristics      |                                     | Category                      | Group without<br>disease<br>(n = 175) | Group with<br>disease<br>(n = 340) | $\chi^2$ or t | p     |
|----------------------|-------------------------------------|-------------------------------|---------------------------------------|------------------------------------|---------------|-------|
| Predisposing factors | Gender                              | Boys                          | 91(52.0)                              | 146(42.9)                          | 3.82          | 0.06  |
|                      |                                     | Girls                         | 84(48.0)                              | 194(57.1)                          |               |       |
|                      | Area of residence                   | Metropolitan region           | 55(31.4)                              | 128(37.6)                          | 1.95          | 0.17  |
|                      |                                     | Non-metropolitan region       | 120(68.6)                             | 212(62.4)                          |               |       |
| Enabling factors     | Type of health insurance            | National Health Insurance     | 76(43.4)                              | 149(43.8)                          | 0.01          | 1.00  |
|                      |                                     | Medical Aid                   | 99(56.6)                              | 191(56.2)                          |               |       |
|                      | Living with parents                 | Both parents                  | 94(53.7)                              | 224(65.9)                          | 7.24          | 0.01  |
|                      |                                     | One parent/other              | 81(46.3)                              | 116(34.1)                          |               |       |
|                      |                                     | Present                       | 106(60.6)                             | 167(49.1)                          |               |       |
|                      | Caregiver after school              | Absent (one day or more/week) | 69(39.4)                              | 173(50.9)                          | 6.09          | 0.02  |
|                      | Degree of conversation with parents |                               | 2.0±0.9                               | 2.1±0.9                            | -1.32         | 0.19  |
|                      | Degree of activities with parents   |                               | 2.6±1.1                               | 2.8±1.1                            | -2.34         | 0.02  |
|                      | Degree of indifference by parents   |                               | 2.2±0.8                               | 2.1±0.8                            | 1.09          | 0.28  |
|                      | Degree of abuse by parents          |                               | 2.5±1.0                               | 2.6±1.0                            | -1.77         | 0.08  |
|                      | Duration of daily stay at CCC (min) |                               | 184.1±82.5                            | 174.9±75.1                         | 1.26          | 0.21  |
|                      | Satisfaction with teachers at CCC   |                               | 3.8±0.8                               | 3.7±0.9                            | 0.87          | 0.39  |
| Need factors         | Number of diseases                  |                               | 0.0±0.0                               | 1.6±1.0                            | -21.00        | <.001 |
|                      | Perceived physical symptoms         |                               | 1.7 ±0.5                              | 1.9±0.6                            | 4.16          | <.001 |
